# Supplementary material for: Hypermethylation of mitochondrial DNA in vascular smooth muscle cells impairs cell contractility
Source: PubMed Central journal article supplement (PMC6971246; doi:10.1038/s41419-020-2240-7), 2020-01-20
Supplement: 41419_2020_2240_MOESM17_ESM.pdf [file 41419_2020_2240_MOESM17_ESM.pdf]

Please complete the table below to indicate the contributions of all named authors to the figures.

Figure 1:

|  |
|--|
|  |
|--|

Figure 2:

|  |
|--|
|  |
|--|

Figure 3:

|  |
|--|
|  |
|--|

Figure 4:

|  |
|--|
|  |
|--|

Figure 5:

|  |
|--|
|  |
|--|

Figure 6:

|  |
|--|
|  |
|--|

Signed for and on behalf of the Author(s):

|  |
|--|
|  |
|--|

Print Name:

|  |
|--|
|  |
|--|

Date:

|  |
|--|
|  |
|--|
